# Supplementary material for: Evaluation of Strategies to Enhance Community-Based Naloxone Distribution Supported by an Opioid Settlement
Source: PubMed Central journal article supplement (PMC11140538; doi:10.1001/jamanetworkopen.2024.13861), 2024-05-30
Supplement: jamanetwopen-e2413861-s002.pdf [file jamanetwopen-e2413861-s002.pdf]

## Data Sharing Statement

Zang. Evaluation of Strategies to Enhance Community-Based Naloxone Distribution Supported by an Opioid Settlement. *JAMA Netw Open*. Published May 30, 2024.

doi:10.1001/jamanetworkopen.2024.13861

### Data

**Data available:** Yes

**Data types:** Data (not involving human participants)

**How to access data:** Data will be made available in the manuscript and its appendix

**When available:** With publication

### Supporting Documents

**Document types:** None

### Additional Information

**Who can access the data:** anyone requesting the data

**Types of analyses:** for any purpose

**Mechanisms of data availability:** with investigator support
